# Supplementary material
Source: Research Square preprint supplement (doi:10.21203/rs.3.rs-9940561/v1)

**Teaching Session Feedback Questionnaire**

Adapted for undergraduate/postgraduate medical education contexts

**Section 1: Curriculum Content & Instructional Design**

How would you rate your mastery of the knowledge points covered in this teaching session?

A. Full mastery, with the ability to transfer learning to novel scenarios

B. Basic mastery, but requiring review and consolidation

C. Partial understanding, with residual knowledge gaps

D. No comprehension of the content

How appropriate was the information load of this session?

A. Well-aligned with the instructional pace, neither rushed nor sparse

B. Slightly excessive, resulting in cognitive overload

C. Slightly insufficient, leaving room for deeper exploration

D. Overly dense, impeding effective processing

How would you evaluate the logical coherence of the curriculum content?

A. Highly structured, with clear progressive scaffolding

B. Mostly clear, with occasional non-sequential transitions

C. Acceptable, but with minor organizational inconsistencies

D. Lacking discernible structure

**Section 2: Teaching Delivery & Classroom Interaction**

How would you describe the instructor’s delivery speed?

A. Appropriate, allowing simultaneous note-taking and comprehension

B. Relatively fast, requiring maximal sustained attention

C. Relatively slow, prone to distraction

D. Inconsistent pacing, difficult to adapt to

What was the level of student–instructor interaction during the session?

A. Frequent, with high learner engagement

B. Moderate, allowing sufficient reflection time

C. Limited, primarily didactic delivery

D. Virtually absent

How would you characterize the classroom atmosphere?

A. Engaging and dynamic, with a positive perception of time passage

B. Rigorous and focused, conducive to deep learning

C. Monotonous, with low stimulation

D. Excessively tense, discouraging questions

**Section 3: Learning Outcomes & Gains**

Which of the following best describes the primary value of this session to you? (Select all that apply)

A. Constructed a systematic knowledge framework for the topic

B. Resolved pre-existing knowledge gaps or misconceptions

C. Enhanced capacity to apply knowledge to clinical/scenario-based problems

D. Increased interest in this area of medicine

E. Minimal perceived benefit

What strategies do you plan to use to consolidate the content of this session? (Select all that apply)

A. Organize notes and develop concept maps/mind maps

B. Complete assigned post-session tasks or practice questions

C. Conduct extended reading of relevant academic resources

D. No planned review at this stage; will revisit before summative assessment

**Section 4: Open-Ended Items (Your feedback is highly valued)**

1.Which single component or segment of this session did you find most engaging or impactful? Please specify.

2.Do you have any suggestions for improving this session or future teaching delivery? (e.g., more clinical case exemplars, adjusted pacing, increased hands-on simulation components, etc.)

**Measurement Properties of the Teaching Session Feedback Questionnaire**

**Reliability and Validity Evidence**

The questionnaire was developed by referencing established medical education evaluation frameworks, including the Dundee Ready Education Environment Measure (DREEM)and the Medical Teacher Clinical Teaching Perception Inventory, with item wording tailored to single-session feedback contexts.


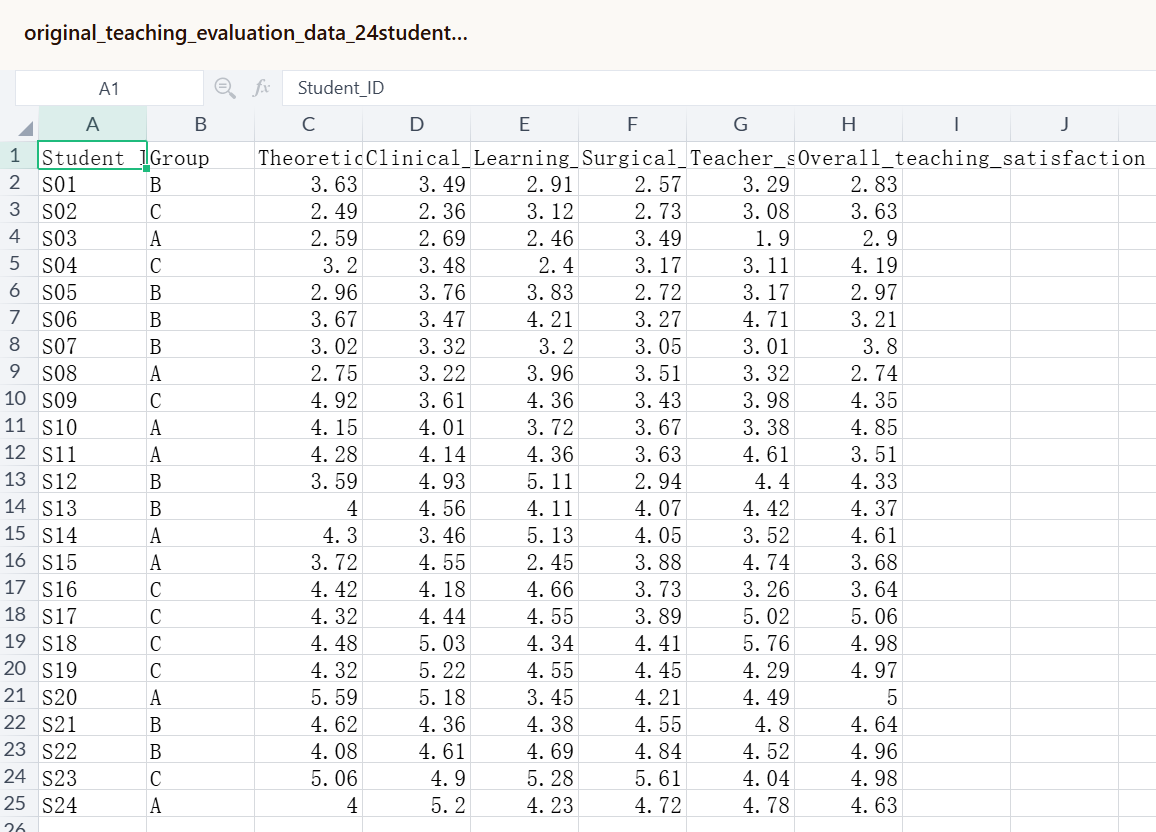

Supplement: Supplementary file 1 [file 08f43ffbdeda419ecc57927e.docx]
