# Supplementary material
Source: Research Square preprint supplement (doi:10.21203/rs.3.rs-9940561/v1)
Supplement: Supplementary file 2 [file 80c08367abaaa7e3b5b63998.docx]

**Oral Surgery Mini-CEX Clinical Skills Assessment Form**

| **essential information** | | | | | | | | | | |
| --- | --- | --- | --- | --- | --- | --- | --- | --- | --- | --- |
| Assessment Date:  ____ Year, __ Month, __ Day | | Assessment scenarios: □ Complex tooth extraction □ Cystectomy □ Others: ______ | | | | | Assessment of teachers (Associate Senior Level and above) | | Assessed Person: | |
| Type of Surgery | | | Operating time: ____ minutes | | | | Blinded scoring: □ Yes □ No | | | Score Weight: Average score for each dimension (out of 50) |
| **Core Competency Dimension** | **Scoring Criteria (5-point scale)** | | | | | | | | | |
| Preoperative Preparation (5 points) | 5 points: The instruments are properly categorized and arranged; imaging data (CBCT/panoramic images) accurately depict the surgical pathway; preoperative communication is comprehensive.  4 points: The equipment is basically complete, image annotations are clear, and communication is relatively thorough.  3 points: Missing equipment details, blurred image annotations, and concise communication.  2 points: Disorganized equipment use, absence of imaging guidance, and lack of communication  1 point: Severe lack of preparation, rendering the surgery impossible to perform | | | | | | | | | |
| Aseptic Principles (5 points) | Step 5: Strictly adhere to aseptic techniques (handwashing, wearing gloves, using drapes, and instrument transfer) without any violations.  4 points: Basic aseptic techniques are followed, with occasional minor violations (e.g., gloves contacting non-aseptic areas).  3 points: Some procedures did not meet aseptic standards (e.g., improper use of drapes).  2 points: Multiple violations of aseptic principles (e.g., instrument contamination)  1 point: Severe violation of aseptic principles, posing an infection risk | | | | | | | | | |
| Rationality of surgical design (8 points) | 5 points: Personalized surgical approach (based on imaging/pathology), incision design that adheres to anatomical layers, anticipation of potential risks, and establishment of contingency plans.  4 points: The proposal is fundamentally reasonable, with a relatively standardized incision design and a comprehensive contingency plan.  3 points: The proposal is average; the incision design lacks optimization, and the contingency plan is simplistic.  2 points: The procedure lacks individualization, the incision design is inappropriate, and there is no emergency response plan.  1 point: The protocol is flawed and cannot ensure surgical safety. | | | | | | | | | |
| Operational Standardization (10 points) | 5 points: Precise anatomical layer dissection (e.g., design of periosteal flap, creation of bone windows), proficient instrument handling, and smooth surgical movements  4 points: The hierarchical decomposition is relatively clear; instrument operation is basically proficient; movements appear slightly stiff.  3 points: Ambiguous hierarchical decomposition, non-standardized instrument usage, and slow movement execution  2 points: Confusion in procedural hierarchy, incorrect instrument usage, and disorganized movements  1 point: Severe operational error that jeopardizes surgical safety | | | | | | | | | |
| Vascular neuroprotection (8 points) | 5 points: Accurately identify and protect critical structures such as the inferior alveolar nerve and maxillary tubercle vessels, with no intraoperative injury observed.  4 points: Basic identification of key structures; occasional mild stretching but no substantial damage observed.  Grade 3: Partial structural recognition is unclear, with potential risk of damage  2 points: Failure to identify critical structures, resulting in neural/vascular injury  Grade 1: Severe damage to nerves/vessels requiring emergency intervention | | | | | | | | | |
| Adaptability (8 points) | 5 points: Decisive and scientifically effective management of intraoperative emergencies (e.g., hemorrhage, fracture, infection).  4 points: Basic response to emergencies with relatively reasonable measures  Grade 3: Delayed response with inadequate measures  2 points: Unable to handle emergencies; teacher intervention required  1 point: Treatment error exacerbating the condition | | | | | | | | | |
| Digital Design Integrity (5 points) | 5 points: Preoperative digital planning (e.g., virtual osteotomy, guide design) is comprehensive; intraoperative execution is precise; and the postoperative follow-up protocol is well-defined.  4 points: The digital planning is essentially complete, intraoperative execution is relatively accurate, and the follow-up protocol is comprehensive.  3 points: The digital planning is simplistic, intraoperative execution lacks precision, and the follow-up protocol is overly brief.  2 points: No digital planning; intraoperative procedure relies solely on experience; no follow-up protocol  1 point: Digital design error leading to surgical failure | | | | | | | | | |
| Precautions during and after surgery (1 point) | 5 points: Complete intraoperative hemostasis was achieved, and postoperative instructions (including antibiotic use, dietary guidance, and follow-up schedule) were comprehensive and personalized.  4 points: Intraoperative hemostasis was essentially achieved, and postoperative medical orders were comprehensive.  3 points: Inadequate intraoperative hemostasis and concise postoperative instructions  2 points: Improper intraoperative hemostasis and absence of postoperative medical instructions  1 point: Intraoperative bleeding was not controlled, and postoperative medical orders were incorrect. | | | | | | | | | |
| **Relevant scoring** | **detailed information** | | | | | | | | | |
| Score Weight | Evenly distributed across all dimensions (total score: 50) | | | | | | | | | |
| Teacher 1's Rating | - | | | | Teacher 2's Rating | | | - | | |
| Weighted Score | - | | | | | | | | | |
| **total points** | ______ points (out of 50) | | | | | grade | | □ Excellent (≥45 points) □ Good (35–44 points) □ Qualified (25–34 points) □ Needs improvement (<25 points) | | |
| Comprehensive Teacher Evaluation Comment | (Include strengths, weaknesses, and improvement suggestions) | | | | | | | | | |
| The person being assessed signs. | ______________ | | | Teacher Signature | | | |  | | |
| **direction for use** | **detailed information** | | | | | | | | | |
| Score consistency | Two teachers conducted independent blinded scoring and calculated a weighted average score (with weights adjusted according to specific scenarios; for example, complex tooth extraction emphasizes "vascular and neural protection," while cyst excision focuses on "surgical design"). | | | | | | | | | |
| Scene Adaptation | The dimension weights can be adjusted according to specific surgical types (for example, the weight of "digital design integrity" is increased to 20% in digital guide surgery). | | | | | | | | | |
| data logging | The accompanying design includes the "Mini-CEX Scoring Record Form," which documents the original scores, improvement measures, and follow-up results for each assessment, facilitating statistical analysis. | | | | | | | | | |
| Ethical Statement | This study has been approved by the Ethics Committee of the Second Hospital of Shanxi Medical University (Approval No.:), and all participants have signed the informed consent form. | | | | | | | | | |

### **Consistency Testing Form for the Mini-CEX Score in Oral Surgery**

(Based on Cohen's Kappa coefficient, used to assess consistency between blind ratings by two evaluators)

| **dimension** | **Frequency Table of Consistency in Scoring (Distribution of Scores by Two Teachers)** | **Kappa value (k)** | **Consistency Level (Evaluation Criteria)** |
| --- | --- | --- | --- |
| **Preparation Before Operation** | 5 points: Teacher 1 = people, Teacher 2 = people  4 points: Teacher 1 = people, Teacher 2 = people  3 points: Teacher 1 = people, Teacher 2 = people  2 points: Teacher 1 = people, Teacher 2 = people  1 minute: Teacher 1 = person, Teacher 2 = person |  | □ Excellent (k ≥ 0.8) □ Good  (0.6 ≤ K <0.8) □ General  (0.4 ≤ K <0.6) □ Poor (K <...)  0.4) |
| **Aseptic Principles** | As above (fill in according to a 5-point scale) |  | □ Excellent □ Good □ Average □ Poor |
| **Rationality of surgical design** | As above (fill in according to a 5-point scale) |  | □ Excellent □ Good □ Average □ Poor |
| **Operation Standardization** | As above (fill in according to a 5-point scale) |  | □ Excellent □ Good □ Average □ Poor |
| **Angiovascular protection** | As above (fill in according to a 5-point scale) |  | □ Excellent □ Good □ Average □ Poor |
| **strain capacity** | As above (fill in according to a 5-point scale) |  | □ Excellent □ Good □ Average □ Poor |
| **Digital Design Integrity** | As above (fill in according to a 5-point scale) |  | □ Excellent □ Good □ Average □ Poor |
| **Precautions During and After Surgery** | As above (fill in according to a 5-point scale) |  | □ Excellent □ Good □ Average □ Poor |
| **Overall Scale Consistency** | Merge calculations across all dimensions (based on total score consistency) |  | □ Excellent □ Good □ Average □ Poor |
