# Supplementary material
Source: Research Square preprint supplement (doi:10.21203/rs.3.rs-9940561/v1)
Supplement: Supplementary file 3 [file efb98f387797c67df0c5fed1.docx]

| **Case Presentation Assessment**  **Student ID/Name: __________ Case Number/Name:__________________** | | | |
| --- | --- | --- | --- |
| **Code** | **Assessment Criteria** | **Detailed Description** | **Score (0=Unsatisfactory, 5=Excellent)** |
| **A**​ | **Data Integrity**​ | Completeness and accuracy of the medical history and examination data. | 0 □ 1 □ 2 □ 3 □ 4 □ 5 |
| **B**​ | **Data Synthesis**​ | Ability to extract key positive signs and filter out redundant information. | 0 □ 1 □ 2 □ 3 □ 4 □ 5 |
| **C**​ | **Logical Coherence**​ | Clarity of the presentation logic and appropriateness of time management. | 0 □ 1 □ 2 □ 3 □ 4 □ 5 |
| **D**​ | **Differential Diagnosis**​ | Identification of critical differential points and provision of rationale for exclusion. | 0 □ 1 □ 2 □ 3 □ 4 □ 5 |
| **E**​ | **Diagnostic Accuracy**​ | Standardization of diagnostic terminology and sufficiency of the evidence base. | 0 □ 1 □ 2 □ 3 □ 4 □ 5 |
| **F**​ | **Surgical Design**​ | Rationality of the proposed plan, tailored to the complexity of the case, considering anatomy and risk. | 0 □ 1 □ 2 □ 3 □ 4 □ 5 |
| **G**​ | **Overall Performance**​ | Responsiveness to questions and demonstration of comprehensive professional competence. | 0 □ 1 □ 2 □ 3 □ 4 □ 5 |
| **H**​ | **Bonus**​ | Presence of innovative diagnostic/therapeutic insights or unique perspectives. | 0 □ 1 □ 2 □ 3 □ 4 □ 5 |
| **I**​ | **Penalty**​ | Presence of significant factual errors or fundamental omissions. | 0 □ 1 □ 2 □ 3 □ 4 □ 5 |
| **Total**​ | **Total Score**​ | **(Sum of A+B+C+D+E+F+G+H-I = Total Score)**​ | **/ 50**​ |
